# Supplementary material
Source: Springer Nature journal article supplement (https://www.springermedizin.de/resource/supplementary/12985_2012_1862_MOESM5_ESM.pdf/9610616)

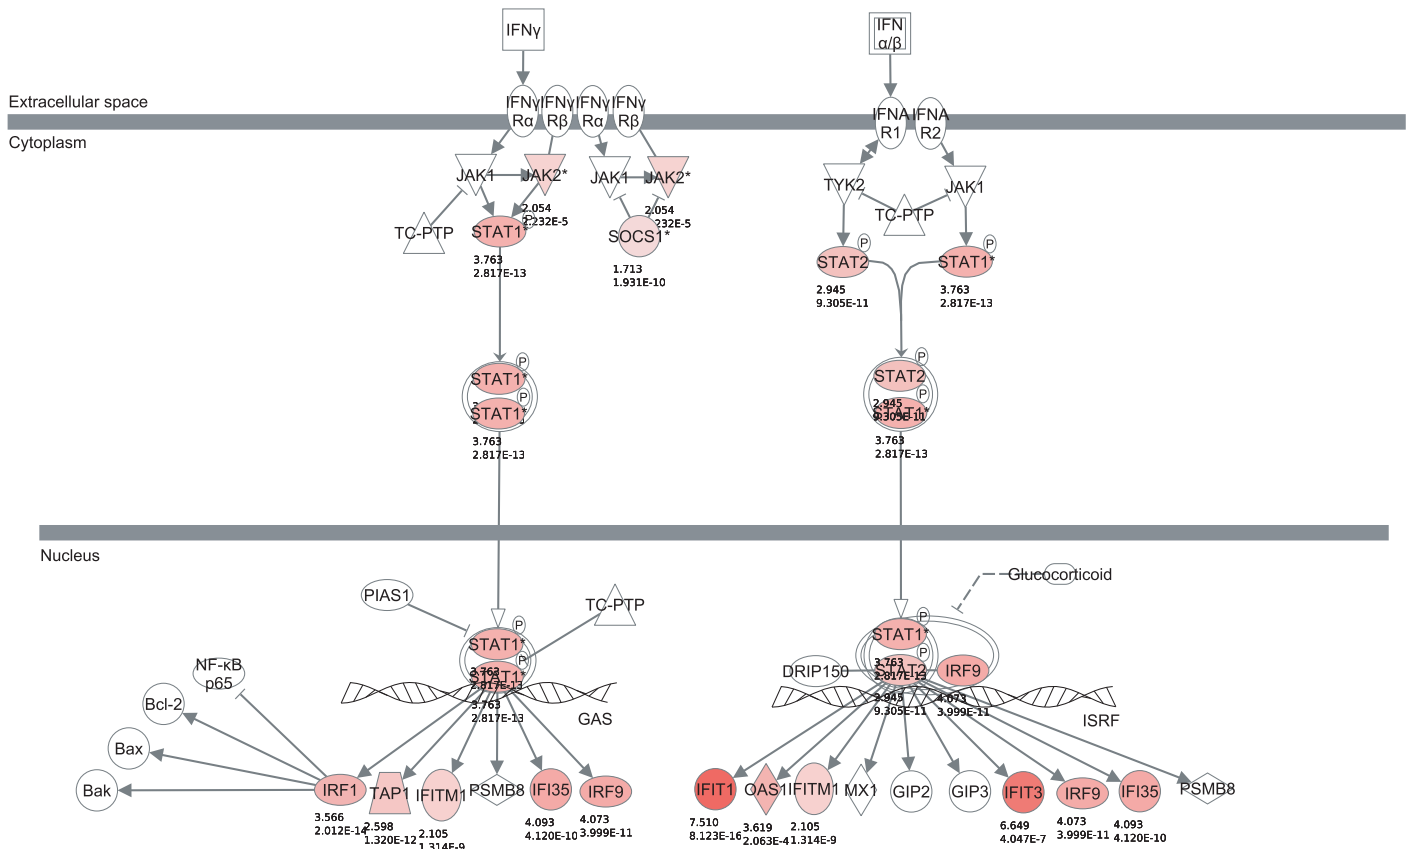

© 2000-2011 Ingenuity Systems, Inc. All rights reserved.

## Network Shapes

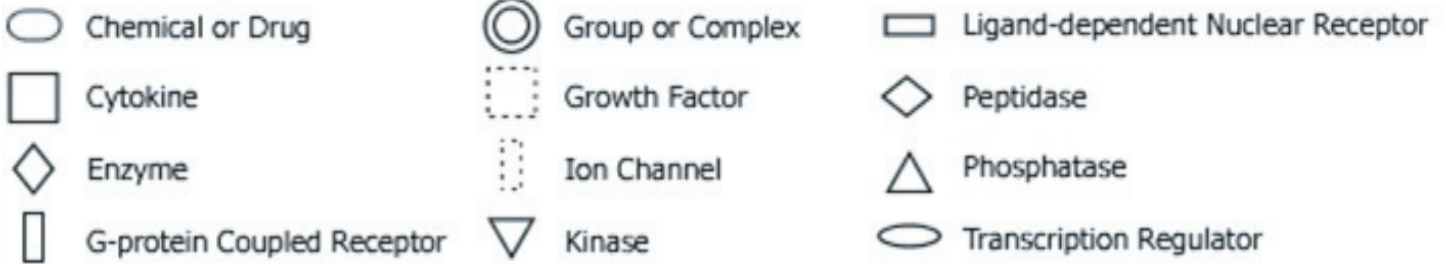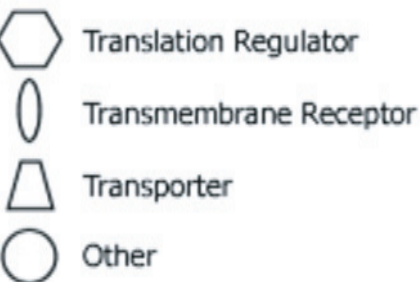

Supplement: MOESM5 [file 9610616]
